# Supplementary material
Source: PubMed Central journal article supplement (PMC6626621)
Supplement: NIHMS1033220-supplement-supplementary_data.pdf [file NIHMS1033220-supplement-supplementary_data.pdf]

Supplemental online content for:

## **Patient Experiences With Oral Chemotherapy: Adherence, Symptoms, and Quality of Life**

Jamie M. Jacobs, PhD; Molly E. Ream, BA; Nicole Pensak, PhD; Lauren E. Nisotel, BS; Joel N. Fishbein, BA;  
James J. MacDonald, BA; Joanne Buzaglo, PhD; Inga T. Lennes, MD, MPH; Steven A. Safren, PhD;  
William F. Pirl, MD, MPH; Jennifer S. Temel, MD; and Joseph A. Greer, PhD

*J Natl Compr Canc Netw* 2019;17(3):221–228

**eAppendix 1:** List of Generic Oral Chemotherapy and Targeted Therapy Drugs

**Appendix 1. List of Generic Oral Chemotherapy and Targeted Therapy Drugs**

|                        |
|------------------------|
| Afatinib               |
| Axitinib               |
| Bosutinib              |
| Capecitabine           |
| Ceritinib              |
| Crizotinib             |
| Dabrafenib             |
| Dasatinib              |
| Erlotinib              |
| Everolimus             |
| Gefitinib              |
| Ibrutinib              |
| Imatinib nilotinib     |
| Lapatinib              |
| Lenalidomide           |
| Osimertinib            |
| Palbociclib            |
| Pazopanib              |
| Pomalidimide           |
| Sorafenib              |
| Sunitinib temozolomide |
